# Supplementary material for: Loess surface grafted functional copolymer for removing basic fuchsin
Source: Royal Society of Chemistry journal article supplement (doi:10.1039/c7ra00610a), 2017-01-01
Supplement: c7ra00610a1.pdf [file c7ra00610a1.pdf]

## Loess surface grafted functional copolymer for removing basic fuchsin

Tingjun Lu, Li Wang, Yufeng He\*, Jing Chen, Rong-Min Wang\*

### Supplementary Information

#### *Preparation of LC surface grafting polyacrylamide (LC-PAM)*

The procedure for preparation of LC surface grafting polyacrylamide (LC-PAM) was similar to LC-PAmS, which the amount of monomer was changed. Using 1.0 g of AM and 0.05 g of MBA without StS, LC-PAM was obtained.

#### *Preparation of LC surface grafting polystyrene sulfonate (LC-PStS)*

The procedure for preparation of LC- PStS was similar to LC-PAmS, which the amount of monomer was changed. Using 1.0 g of StS and 0.05 g of MBA without AM, LC- PStS was obtained.

#### *Characterization*

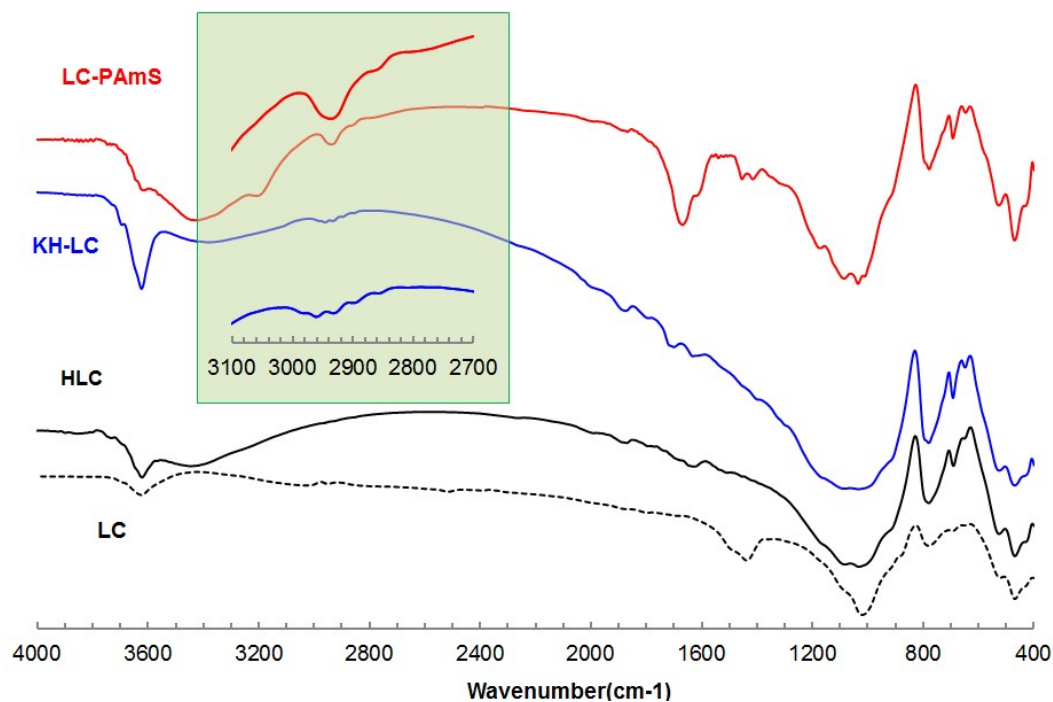

**Figure S1** FT-IR spectra of LC-PAmS and its materials (LC, HLC, LC-KH).

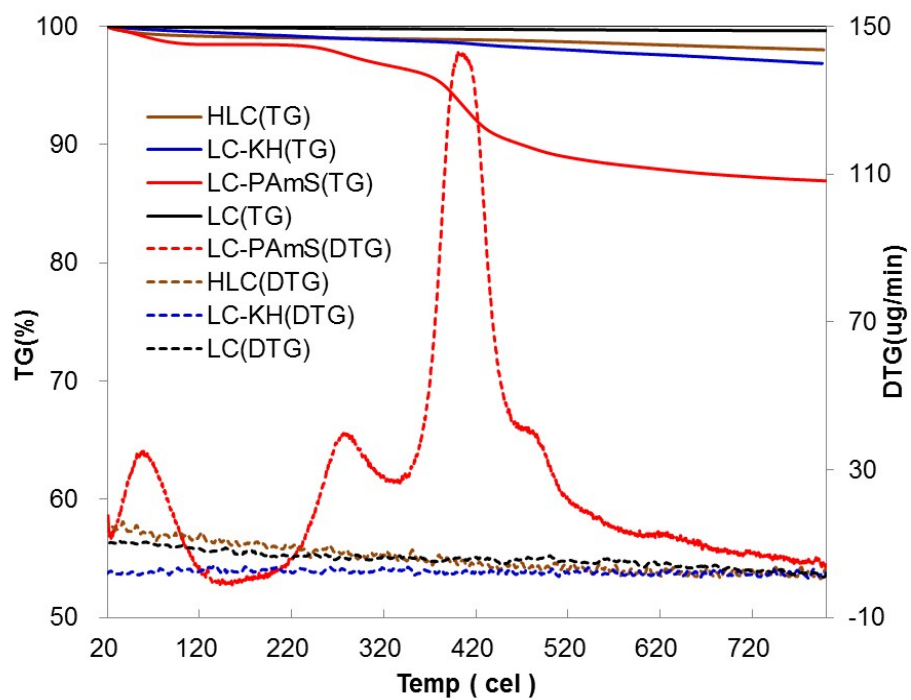

Figure S2 TG and DTG curves of LC-PAmS and its materials (LC, HLC, LC-KH).
